# Supplementary material for: A dual-state emission triphenylamine-based polymer with donor–acceptor–donor structural arrangement: facile synthesis and efficient selective detection of TNT based on fluorescence “turn-off”
Source: Royal Society of Chemistry journal article supplement (doi:10.1039/d4nj05255b), 2025-01-01
Supplement: d4nj05255b1.pdf [file d4nj05255b1.pdf]

1           **Dual-State Emission Triphenylamine-Based Polymer with**  
2           **Donor-Acceptor-Donor Structural Arrangement: Facile**  
3           **Synthesis and Efficient Selective Detection of TNT Based on**  
4           **Fluorescence “Turn-off”**

5  
6           **Chi Zhong<sup>a, b, c</sup>, Ziqi Wu<sup>a, b, c</sup>, Yangqing Mao<sup>a, b, c</sup>, Bing Zhao<sup>a, b, c</sup>, Yi Sun<sup>a, b\*</sup>, Min Zheng<sup>a</sup>,**  
7           **Mingru Zhou<sup>c</sup>, Guanjun Chang<sup>a\*</sup>, Yewei Xu<sup>a, b, c\*</sup>**

8           <sup>a</sup> *School of Materials and Chemistry & State Key Laboratory of Environmental-friendly Energy*  
9           *Materials & National Engineering Technology Center for Insulation Materials, Southwest University*  
10           *of Science and Technology, Mianyang 621010, PR China*

11           <sup>b</sup> *Engineering Research Center of Biomass Materials, Ministry of Education, Southwest University*  
12           *of Science and Technology, Mianyang 621010, PR China*

13           <sup>c</sup> *Sichuan Guanmusiyang New Material Technology Co., Ltd., Mianyang 621010, PR China*

14           *\*e-mail: xuyewei@swust.edu.cn (Yewei Xu) ; 287223217@qq.com (Yi Sun);*

15           *gjchang@mail.ustc.edu.cn (Guanjun Chang)*

16

17

## 1 **Experimental Procedure for UV-Visible Absorption Spectroscopy**

2 1 mg of PTPAS solid was added into separate glass vials, and then 20 mL of different  
3 polar solvents (HEX, TCM, EA, DCM, THF, DMF, EtOH, and MeOH) were added.  
4 After complete dissolution, absorption spectra were measured by using a UV-Visible  
5 spectrophotometer .

## 6 **Experimental Procedure for Fluorescence Testing**

7 1 mg of PTPAS solid was added into separate glass vials, and then 20 mL of different  
8 polar solvents (HEX, TCM, EA, DCM, THF, DMF, EtOH, and MeOH) were added.  
9 After complete dissolution, fluorescence spectra testing were performed under  
10 excitation at the maximum absorption wavelength.

## 11 **Experimental Procedure for Fluorescence Quantum Yield ( $\phi_F$ )**

12 A PTPAS solution with an absorbance of less than 0.05 at an absorption wavelength  
13 of 360 nm was prepared, and quinine sulfate solution ( $\phi_F = 0.54$ , solvent: 1.0 N H<sub>2</sub>SO<sub>4</sub>  
14 aqueous solution) was utilized as a reference sample [1, 2]. The fluorescence spectrum  
15 of PTPAS was measured by using a fluorescence spectrometer. The fluorescence  
16 quantum yield ( $\phi_F$ ) was calculated by using Equation S1 based on the obtained test data.

$$\phi_{F,x} = \phi_{F,st} \times \frac{F_x}{F_{st}} \times \frac{f_{st}}{f_x} \times \frac{n_x^2}{n_{st}^2} \quad (1)$$

17  
18 st and x represent the standard sample and the test sample, respectively.  $\phi_F$  denotes the  
19 fluorescence quantum yield. F corresponds to the integral area of the fluorescence peak.  $f$  signifies  
20 the absorption factor, and n is the refractive index of the solvent.

1

## 2 **Experimental Procedure for Fluorescence Testing of PTPAS in** 3 **H<sub>2</sub>O/THF Solvent**

4 10 mL solutions with varying ratios of H<sub>2</sub>O/THF were individually prepared, with  
5 ratios of 10:0, 9:1, 8:2, 7:3, 6:4, 5:5, 4:6, 3:7, 2:8, 1:9, and 0:10. Subsequently, 100 μL  
6 of a 2 mM PTPAS solution was sequentially added to each solution. After thorough  
7 shaking and mixing, fluorescence spectra under an excitation wavelength of 365 nm  
8 were tested.

## 9 **Experimental Procedure for the Detection Limit of PTPAS for TNT**

10 A 500 mL solution of PTPAS with a concentration of 0.01 g/L (THF/H<sub>2</sub>O = 1:9)  
11 was prepared. 10 mL were measured and added to corresponding glass bottles.  
12 Subsequently, TNT solutions with concentrations of 1 g/L, including 0, 2.5, 5, 7.5, 10,  
13 17.5, 25, 37.5, 50, 75, and 100 μL, were sequentially added. The fluorescence intensity  
14 of the different solutions was tested under an excitation wavelength of 365 nm, and the  
15 fitting results were analyzed using equations S2 and S3.

$$\frac{I_0}{I} = 1 + K_{SV}[Q]$$

16 (2)

$$C_L = \frac{3S}{K_{SV}}$$

17 (3)

18  $I_0$  and  $I$  represent the initial fluorescence intensity of PTPAS before and after adding TNT,  
19 respectively..  $I$  denotes the fluorescence intensity after complete response to the added TNT.  $[Q]$

1 corresponds to the concentration of TNT in the tested sample.  $K_{sv}$  signifies the Stern-Volmer  
2 constant.  $C_L$  is the detection limit of the sensor.  $S$  represents the 15-fold standard deviation of the  
3 blank sample.

#### 4 **Experimental Procedure for Fluorescence Response Time**

5 10 mL solutions of PTPAS were individually prepared, with the concentrations of  
6 10, 20, 40, 60, 80, and 100  $\mu\text{M}$  ( $\text{H}_2\text{O}/\text{THF}=9:1$ ), and 3.5 mL of each solution was  
7 measured and added to the cuvette. Subsequently, 70  $\mu\text{L}$  of a 2 mM TNT solutions were  
8 also added to the corresponding cuvette. The changes in fluorescence intensity of the  
9 solutions over time were measured under an excitation wavelength of 365 nm.

#### 10 **Experimental Procedure for the Effect of pH on Fluorescence**

##### 11 **Performance**

12 50 mL solutions were prepared with pH values ranging from 1 to 13, using a  $\text{H}_2\text{O}$   
13 and THF ratio of 9:1. Subsequently, 10 mL of each solution was measured and added  
14 to 100  $\mu\text{L}$  of a 2 mM PTPAS THF solution. After thorough mixing by oscillation, the  
15 fluorescence spectra of the solution were measured separately under an excitation  
16 wavelength of 365 nm. Subsequently, 100  $\mu\text{L}$  of a 2 mM TNT solution was added to  
17 the corresponding solutions, thoroughly mixed by oscillation, and the fluorescence  
18 spectra of the solutions at  $\text{pH}=1-13$  were measured under an excitation wavelength of  
19 365 nm.

#### 20 **Experimental Procedure for the Selectivity of PTPAS to TNT**

21 Solutions of metal ion nitrates ( $\text{Ag}^+$ ,  $\text{Al}^{3+}$ ,  $\text{Ca}^{2+}$ ,  $\text{Co}^{3+}$ ,  $\text{Cu}^{2+}$ ,  $\text{Fe}^{2+}$ ,  $\text{Fe}^{3+}$ ,  $\text{Mg}^{2+}$ ,  $\text{Mn}^{2+}$ ,  
22  $\text{Ni}^{2+}$ ,  $\text{Zn}^{2+}$ ) and nitro-based compounds (CNB, NP, DNB, NT, NB, TNT, DNT, HMX,

1 RDX) were prepared in advance at a concentration of 10 mM. A 500 mL solution of  
2 PTPAS with a concentration of 20  $\mu$ M (THF/water = 1:9) was then prepared, and 10  
3 mL of this solution were measured and added to different glass bottles. Subsequently,  
4 20  $\mu$ L of the pre-prepared metal ion and nitro compound solutions were sequentially  
5 added to the corresponding bottles. After equilibration, the fluorescence intensity was  
6 measured under an excitation wavelength of 365 nm.

### 7 **Theoretical Calculation**

8 All theoretical calculations were conducted using the density functional theory  
9 (DFT) within the Gaussian 16 program package. The binding energy between the  
10 polymer and TNT was calculated at the 6-31G(d,p) level of theory using the B3LYP-  
11 GD3(BJ) functional, with the solvent effect of water being considered using the SMD  
12 solvent model. The Natural Transition Orbital (NTO) analysis of the polymer was  
13 performed at the 6-311G(d,p) level of theory using the B3LYP-GD3(BJ) functional,  
14 with the solvent effect of tetrahydrofuran being considered using the SMD solvent  
15 model.

### 16 **Lippert-Mataga equation**

$$\Delta f = \frac{\varepsilon - 1}{2\varepsilon + 1} - \frac{n^2 - 1}{2n^2 + 1} \quad (4)$$

17  
18  $\Delta f$  represents the orientational polarizability of the solvent.  $n$  is the refractive index  
19 of the solvent.  $\varepsilon$  denotes the dielectric constant of the solvent.

20

21 **Table S1** Elemental analysis for PTPAS

1 Anal. Calcd for C<sub>36</sub>H<sub>26</sub>N<sub>2</sub>O<sub>2</sub>S

|          | C(%)  | H(%) | N(%) | O(%) | S(%) |
|----------|-------|------|------|------|------|
| Expected | 78.52 | 4.76 | 5.09 | 5.81 | 5.82 |
| Found    | 78.31 | 4.92 | 5.26 | 5.79 | 5.72 |

2

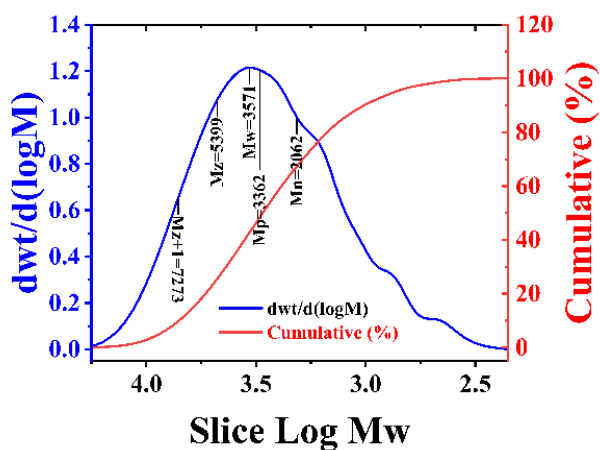

3

4 **Fig. S1** The molecular weight distribution chart of PTPAS measured by GPC

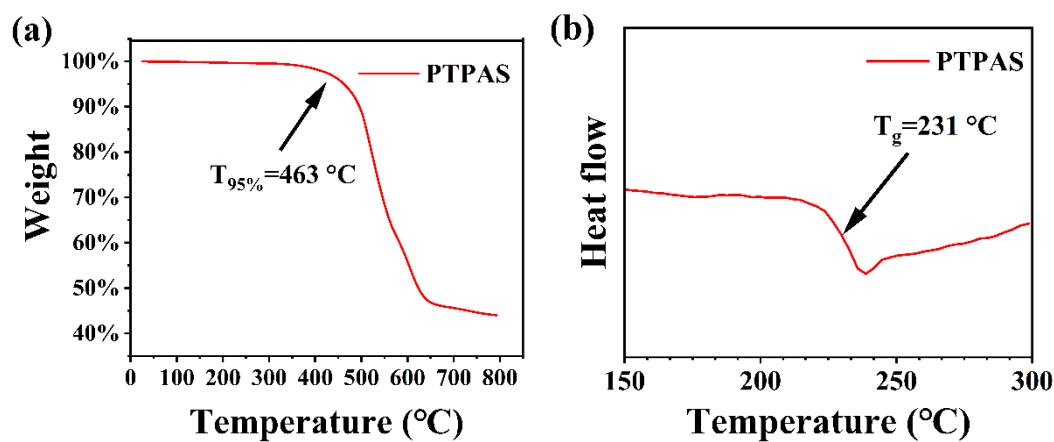

5

6 **Fig. S2 (a)** Thermogravimetric Analysis (TGA) of PTPAS under a nitrogen atmosphere; **(b)**  
7 Differential Scanning Calorimetry (DSC) of PTPAS under a nitrogen atmosphere.

8

9 **Table S2.** Comparative analysis of thermal properties between PTPAS and D-A-D polymers

| Polymers | T <sub>d</sub> (°C) | References |
|----------|---------------------|------------|
| P1       | 310                 | [3]        |

|        |     |           |
|--------|-----|-----------|
| P3     | 480 | [4]       |
| PVT-PI | 445 | [5]       |
| P3     | 320 | [6]       |
| PTPAS  | 463 | This work |

1  $T_d$  was the temperature at which the polymer lost 5% of its weight.

2

3

4

5 **Table S3.** Photophysical parameters of PTPAS in solid state

| Polymer | $\lambda_{\text{abs}}(\text{nm})$ | $\lambda_{\text{em}}(\text{nm})$ | $\tau(\text{ns})$ | $\phi_F$ |
|---------|-----------------------------------|----------------------------------|-------------------|----------|
| PTPAS   | 374                               | 475                              | 1.8               | 0.09     |

6  $\lambda_{\text{abs}}$  is the maximum absorption wavelength.  $\lambda_{\text{em}}$  represents the maximum emission wavelength.

7  $\tau$  signifies the fluorescence lifetime.  $\phi_F$  denotes the fluorescence quantum yield.

8

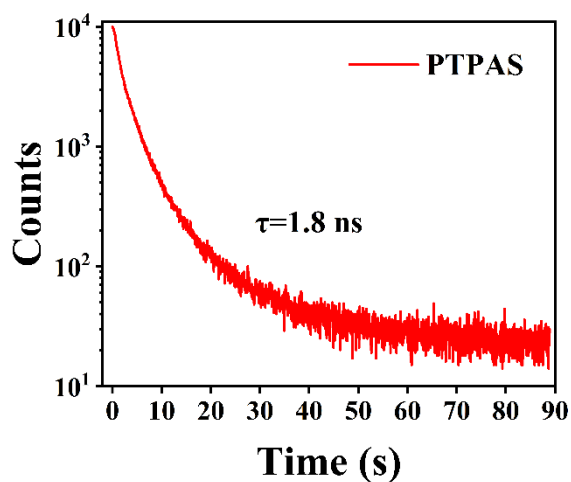

9

10 **Fig. S3** Fluorescence lifetime of PTPAS in solid state.

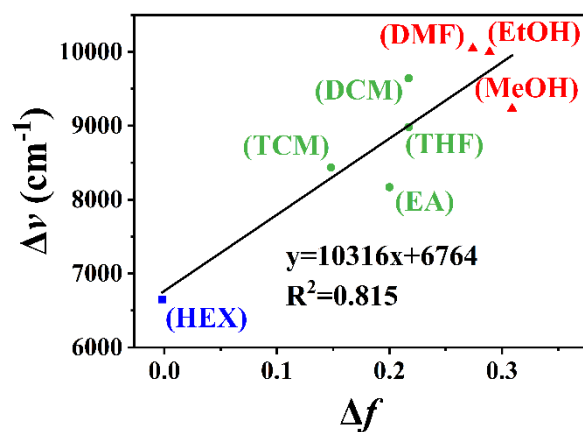

1

2

Fig S4. Fitted curve of the relationship between  $\Delta f$  and  $\Delta\nu$  of PTPAS.

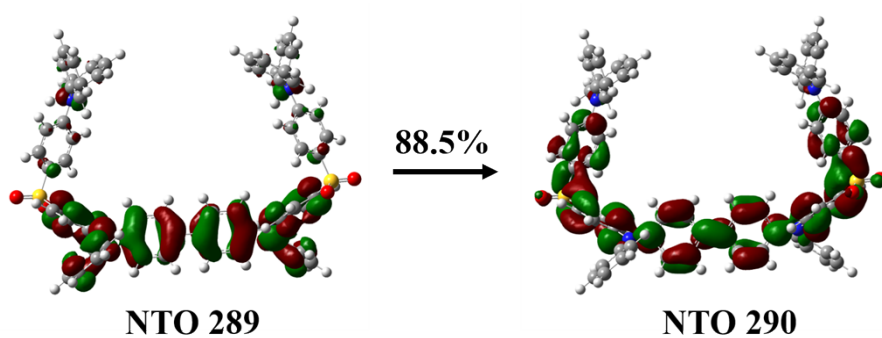

3

4

Fig. S5 Natural transition orbital (NTO) analysis of PTPAS

5

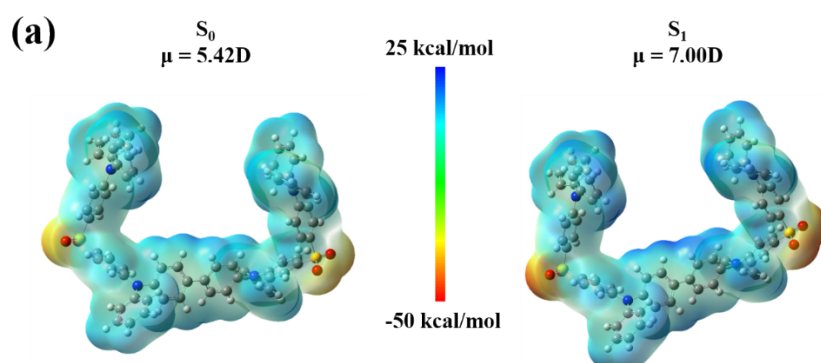

6



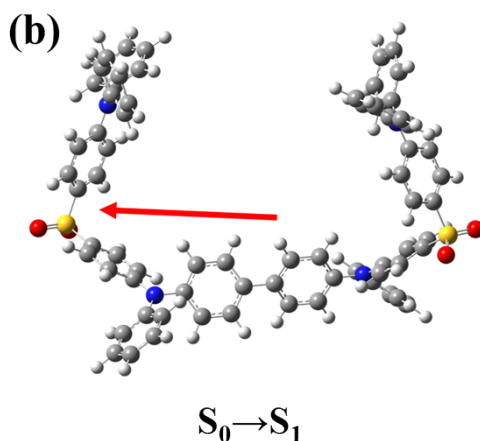

1

2 **Fig. S6 (a)** ESP maps of PTPAS and the resulting molecular dipole; **(b)** The transition dipole

3 moment (red arrow) of PTPAS from the ground state ( $S_0$ ) to the excited state ( $S_1$ ).

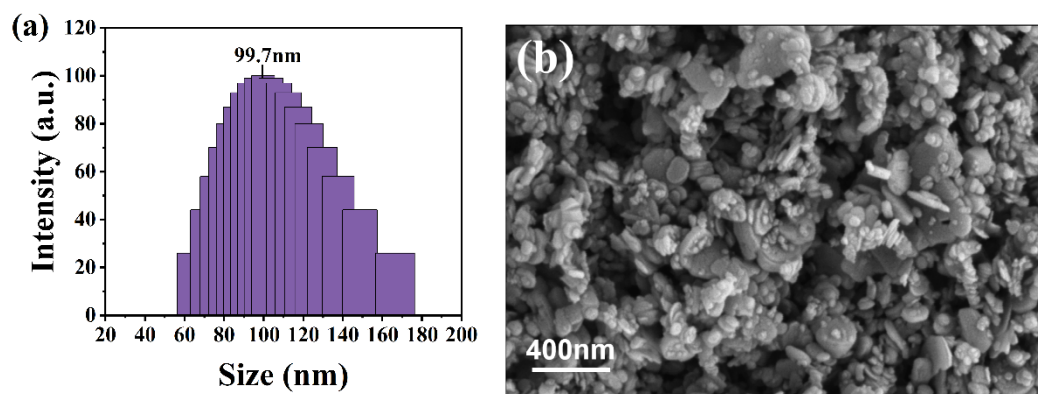

4

5 **Fig. S7. (a)** Particle Size Distribution of PTPAS ( $20 \mu\text{M}$ ) in a solution with  $\text{H}_2\text{O}/\text{THF}$  Ratio of 6:4;

6

**(b)**The SEM image of nanoparticles in PTPAS solution.

7

8 **Table S4.** Performance comparison of PTPAS with reported TNT detectors

| Fluorescent probes | linearity range        | $K_{SV}(\text{M}^{-1})$ | LOD                | References |
|--------------------|------------------------|-------------------------|--------------------|------------|
| PCz-TPE            | —                      | $8.5 \times 10^4$       | —                  | [7]        |
| PTPA1-TPE          | 0~41 $\mu\text{M}$     | $4.9 \times 10^4$       | —                  | [8]        |
| CdTe / CdS (QDs)   | 3~100 $\mu\text{M}$    | $3.2 \times 10^4$       | 375 nM             | [9]        |
| ROMP-P2            | 0.25~10 $\mu\text{M}$  | $5.3 \times 10^5$       | 70 nM              | [10]       |
| PTPEK              | 9~440 $\mu\text{M}$    | $3.29 \times 10^4$      | 4.56 $\mu\text{M}$ | [11]       |
| T3HTP-2            | 0.2 ~ 60 $\mu\text{M}$ | $1.3 \times 10^3$       | 200 $\mu\text{M}$  | [12]       |

|       |                      |                    |       |           |
|-------|----------------------|--------------------|-------|-----------|
| PTPAS | 1.1~11 $\mu\text{M}$ | $2.98 \times 10^5$ | 94 nm | This work |
|-------|----------------------|--------------------|-------|-----------|

1

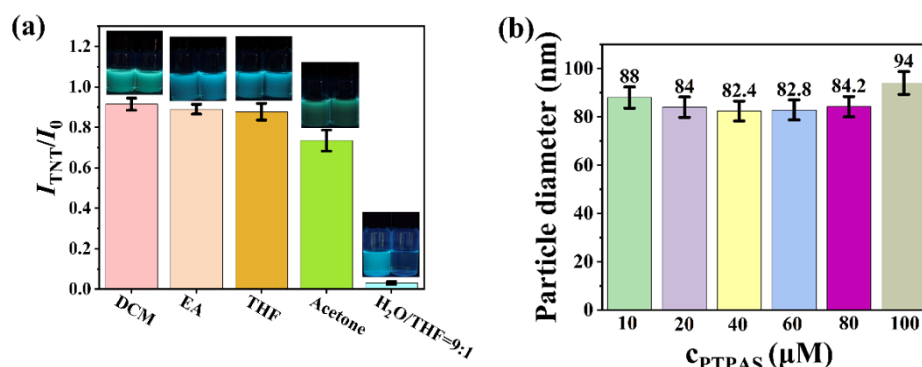

2

3 **Fig. S8.** (a) Fluorescence spectra of PTPAS (20  $\mu\text{M}$ ) after adding TNT (40  $\mu\text{M}$ ) in different  
4 solvents; (b) Average particle size of PTPAS solutions (H<sub>2</sub>O/THF=9:1) with different  
5 concentrations.

5

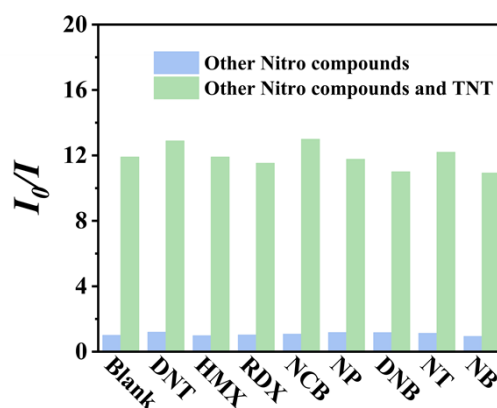

6

7 **Fig. S9** After adding nitro compounds (20  $\mu\text{M}$ ) and TNT (20  $\mu\text{M}$ ) to PTPAS (20 Mm, THF/H<sub>2</sub>O =  
8 1:9), the ratio of initial fluorescence ( $I_0$ ) to fluorescence after response ( $I$ )

8

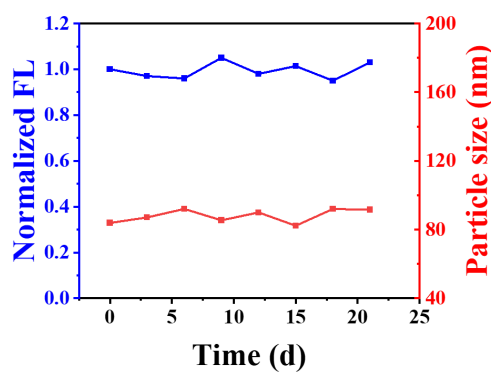

9

10 **Fig. S10** Variation in average particle size and fluorescence intensity of PTPAS solutions (20 $\mu\text{M}$ ,  
11 H<sub>2</sub>O/THF=9:1) over three weeks

11

1

## 2 **References**

- 3 [1] A. M. Brouwer. Standards for photoluminescence quantum yield measurements  
4 in solution (IUPAC technical report). Pure and Applied Chemistry. 2011;  
5 83(12): 2213-2228. DOI: <http://doi.org/10.1351/Pac-Rep-10-09-31>
- 6 [2] C. Würth, M. Grabolle, J. Pauli, et al. Relative and absolute determination of  
7 fluorescence quantum yields of transparent samples. Nature Protocols. 2013;  
8 8(8): 1535-1550. DOI: <http://doi.org/10.1038/nprot.2013.087>
- 9 [3] P. C. Raichure, R. Bhatt, V. Kachwal, et al. Multi-stimuli distinct responsive D-  
10 A based fluorogen oligomeric tool and efficient detection of TNT vapor. New  
11 Journal of Chemistry. 2022; 46(14): 6560-6569. DOI:  
12 <http://doi.org/10.1039/d1nj05314k>
- 13 [4] P. Srinivasa Rao, A. Gupta, S. V. Bhosale, et al. Donor-acceptor-acceptor-  
14 based non-fullerene acceptors comprising terminal chromen-2-one  
15 functionality for efficient bulk-heterojunction devices. Dyes and Pigments.  
16 2017; 146: 502-511. DOI: <http://doi.org/10.1016/j.dyepig.2017.07.047>
- 17 [5] H.-C. Wu, C.-L. Liu, W.-C. Chen. Donor-acceptor conjugated polymers of  
18 arylene vinylene with pendent phenanthro[9,10-d]imidazole for high-  
19 performance flexible resistor-type memory applications. Polymer Chemistry.  
20 2013; 4(20): 5261. DOI: <http://doi.org/10.1039/c3py00107e>
- 21 [6] E. B. D. Brito, D. C. Santos, T. P. D. Paula, et al. Synthesis and Characterization  
22 of Copolymers with Fluorene-di-2-thienyl-2,1,3-benzothiadiazole Units for

- 1 Application in Optoelectronic Devices. *Polymers*. 2024; 17(1): 72. DOI:  
2 <http://doi.org/10.3390/polym17010072>
- 3 [7] W. Dong, Z. Ma, P. Chen, et al. Carbazole and tetraphenylethylene based AIE-  
4 active conjugated polymer for highly sensitive TNT detection. *Materials*  
5 *Letters*. 2019; 236: 480-482. DOI: <http://doi.org/10.1016/j.matlet.2018.10.162>
- 6 [8] W. Dong, T. Fei, U. Scherf. Conjugated polymers containing  
7 tetraphenylethylene in the backbones and side-chains for highly sensitive TNT  
8 detection. *RSC Advances*. 2018; 8(11): 5760-5767. DOI:  
9 <http://doi.org/10.1039/c7ra13536j>
- 10 [9] T. Komikawa, M. Tanaka, A. Tamang, et al. Peptide-functionalized quantum  
11 dots for rapid label-free sensing of 2,4,6-trinitrotoluene. *Bioconjugate*  
12 *Chemistry*. 2020; 31(5): 1400-1407. DOI:  
13 <http://doi.org/10.1021/acs.bioconjchem.0c00117>
- 14 [10] B. Ö. Öztürk, S. K. Şehitoğlu. Pyrene substituted amphiphilic ROMP polymers  
15 as nano-sized fluorescence sensors for detection of TNT in water. *Polymer*.  
16 2019; 183: 121868. DOI: <http://doi.org/10.1016/j.polymer.2019.121868>
- 17 [11] Y. W. Xu, C. Zhong, B. Y. Zhang, et al. Facile preparation of  
18 tetraphenylethylene-based porous polymer with dual role of adsorption and  
19 detection for trinitrotoluene. *Polymer*. 2023; 288: 126454. DOI:  
20 <http://doi.org/10.1016/j.polymer.2023.126454>
- 21 [12] B. K. Doan, T. V. T. Tran, T. H. Nguyen, et al. One-pot synthesis of star-shaped  
22 conjugated oligomers based on 3-hexylthiophene, pyrene and triphenylamine as

1 TNT chemosensors. Journal of Photochemistry and Photobiology A: Chemistry.

2 2020; 394: 112496. DOI: <http://doi.org/10.1016/j.jphotochem.2020.112496>

3
